# Supplementary material for: Zika virus NS1 structure reveals diversity of electrostatic surfaces among flaviviruses
Source: Springer Nature journal article supplement (doi:10.1038/nsmb.3213), 2016-04-18
Supplement: 41594_2016_BFnsmb3213_MOESM35_ESM.pdf [file 41594_2016_BFnsmb3213_MOESM35_ESM.pdf]

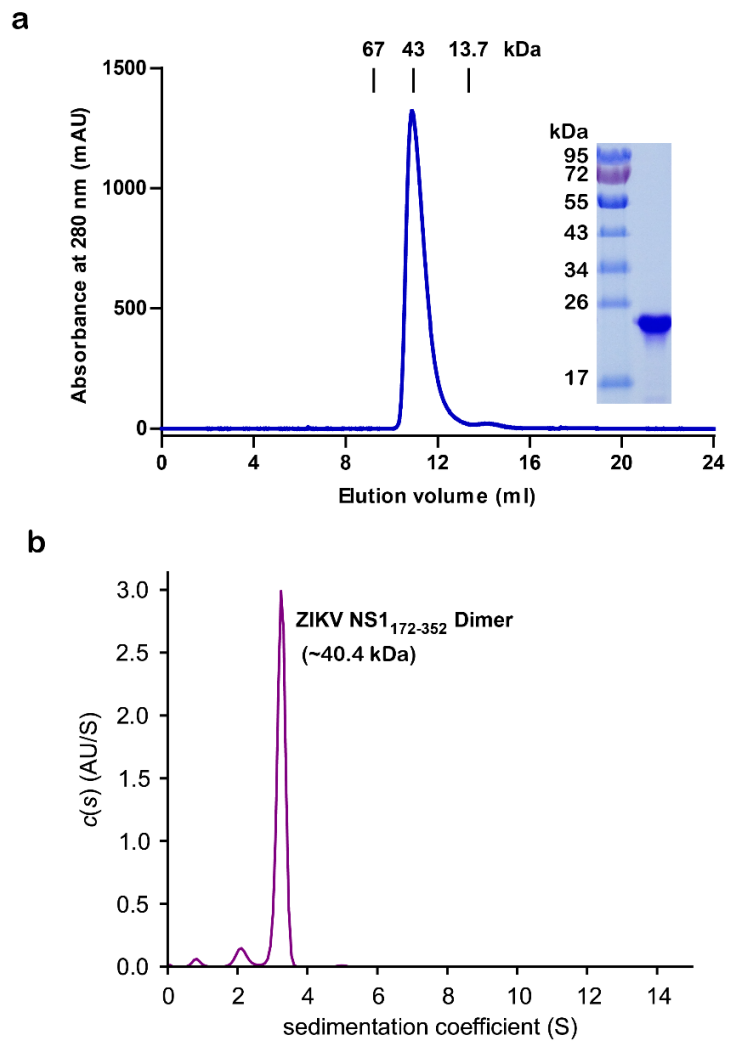

### Supplementary Figure 1

Biophysical characterization of the ZIKV NS1<sub>172-352</sub> protein

(a) Analytical gel filtration of ZIKV NS1<sub>172-352</sub> protein. The 280-nm absorbance curve and the SDS-PAGE migration profile of the pooled sample are shown. (b) Ultracentrifugation sedimentation profile of ZIKV NS1<sub>172-352</sub>. The calculated molecular weight of the indicated protein species is shown.

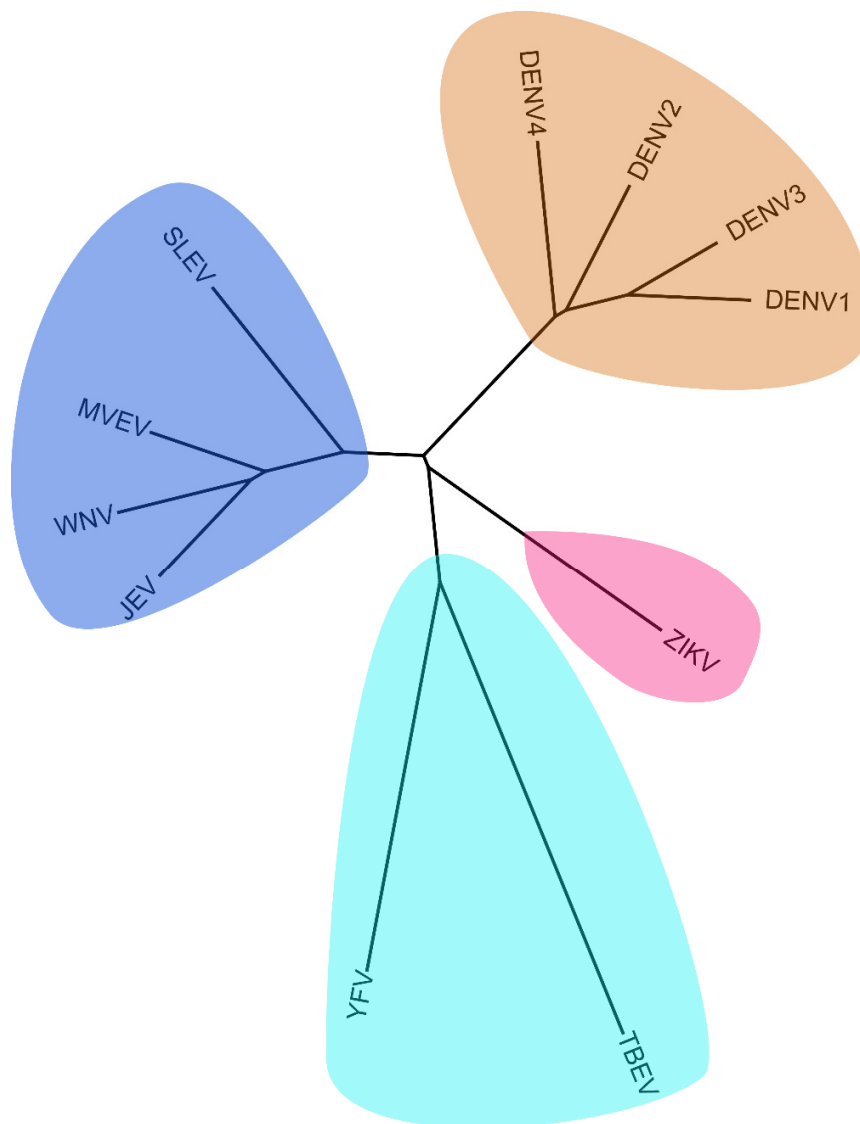

**Supplementary Figure 2**

**Phylogenetic analysis of NS1 proteins from different flaviviruses.**

We applied a neighbor-joining method on NS1 protein sequences from ZIKV and ten representative flaviviruses. The eleven flaviviruses can be classified into four groups. ZIKV is an independent group, separated from the ten representative flaviviruses.

Accession codes: Zika virus (ZIKV) strain BeH819015, AMA12085; West Nile virus (WNV), Q9Q6P4; Dengue virus 1 Nauru/West Pac/1974(DENV1), P17763; Dengue virus 2 Puerto Rico/PR159-S1/1969 (DENV2), P12823; Dengue virus 3 Singapore/8120/1995 (DENV3), Q5UB51; Dengue virus 4 Thailand/0348/1991 (DENV4), Q2YHF0; Japanese encephalitis strain K94P05 (JEV), AAC02714; St. Louis encephalitis (SLEV), D8L537; Yellow fever 17D vaccine strain (YFV), CAA27332; Murray Valley encephalitis (MVEV), NP\_051124; Tick-borne encephalitis (TBEV), NP\_043135.

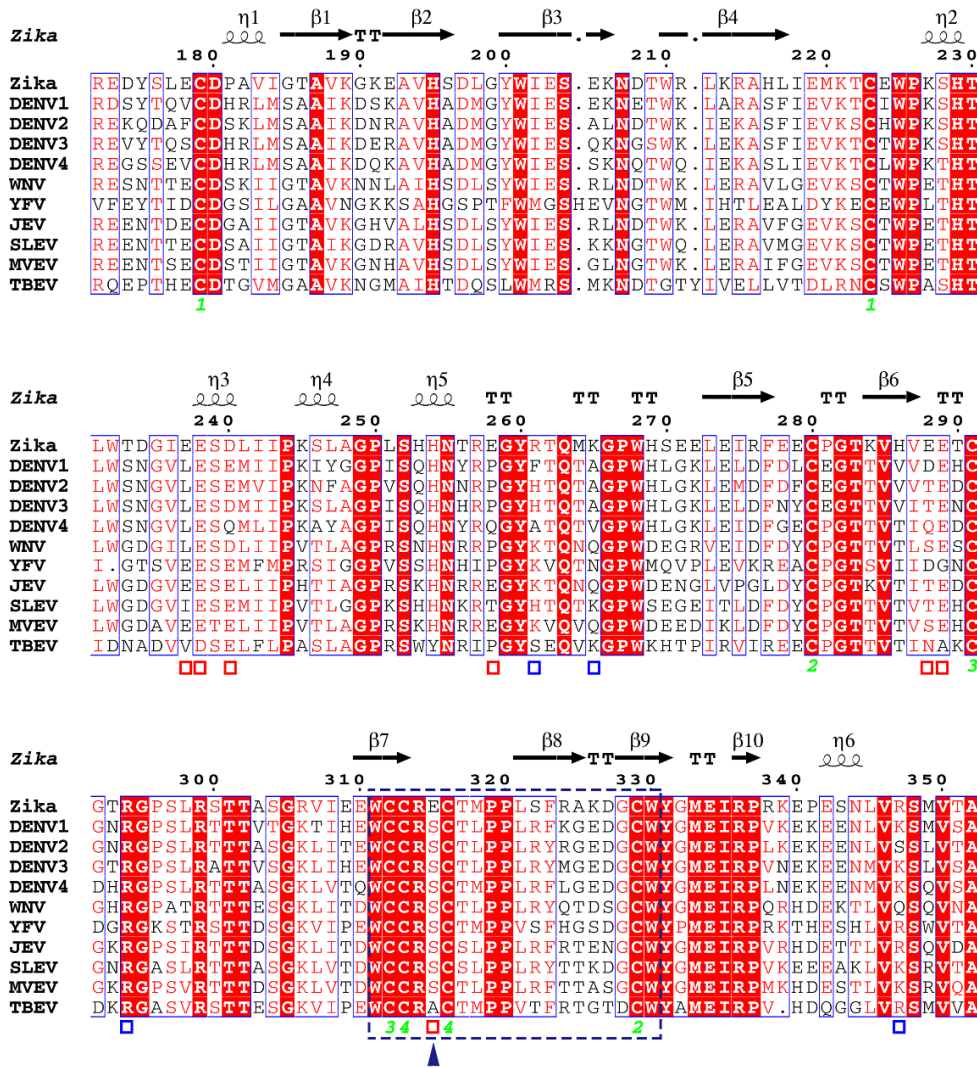

Supplementary Figure 3

Secondary structure and sequence alignment of flavivirus NS1 proteins.

The charged residues that contribute to the electrostatic characters in the loop surface of ZIKV NS1<sub>172-352</sub> are indicated by red and blue squares. The region (residues 311 to 330) recognized by autoreactive antibodies is indicated by dot lines. The unique residue of ZIKV in the highly conserved region is indicated by a dark blue arrowhead.

Accession numbers for the NS1 protein sequence are described in the supplementary figure 2 legend.

1 **Supplementary Table 1. Data collection and refinement statistics.**

| ZIKV NS1 <sub>172-352</sub><br>(PDB code 5IY3)      |                          |
|-----------------------------------------------------|--------------------------|
| <b>Data collection</b>                              |                          |
| Space group                                         | C2221                    |
| Cell dimensions                                     |                          |
| <i>a</i> , <i>b</i> , <i>c</i> (Å)                  | 63.868, 103.755, 114.843 |
| $\alpha$ , $\beta$ , $\gamma$ (°)                   | 90, 90, 90               |
| Resolution (Å)                                      | 50.00-2.20 (2.28-2.20)   |
| <i>R</i> <sub>merge</sub>                           | 0.081 (0.683)            |
| <i>I</i> / $\sigma I$                               | 22.7 (2.4)               |
| Completeness (%)                                    | 97.6 (92.8)              |
| Redundancy                                          | 8.2 (5.9)                |
| <b>Refinement</b>                                   |                          |
| Resolution (Å)                                      | 39.49-2.17               |
| No. reflections                                     | 19693                    |
| <i>R</i> <sub>work</sub> / <i>R</i> <sub>free</sub> | 0.2046/0.2464            |
| No. atoms                                           |                          |
| Protein                                             | 2820                     |
| Ligand/ion                                          | 0                        |
| Water                                               | 79                       |
| <i>B</i> -factors                                   |                          |
| Protein                                             | 54.8                     |
| Ligand/ion                                          |                          |
| Water                                               | 53.0                     |
| R.m.s. deviations                                   |                          |
| Bond lengths (Å)                                    | 0.008                    |
| Bond angles (°)                                     | 1.046                    |

2 \*Values in parentheses are for highest-resolution shell.
